# Supplementary material for: Human fetal and adult epicardial-derived cells: a novel model to study their activation
Source: PubMed Central journal article supplement (PMC5129650; doi:10.1186/s13287-016-0434-9), 2016-11-29

**Figure S1**

**a**

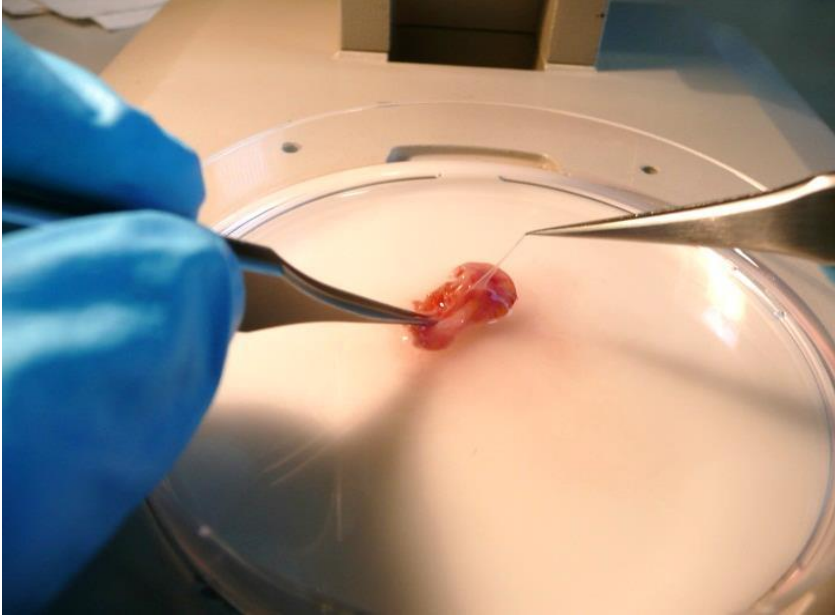

**b**

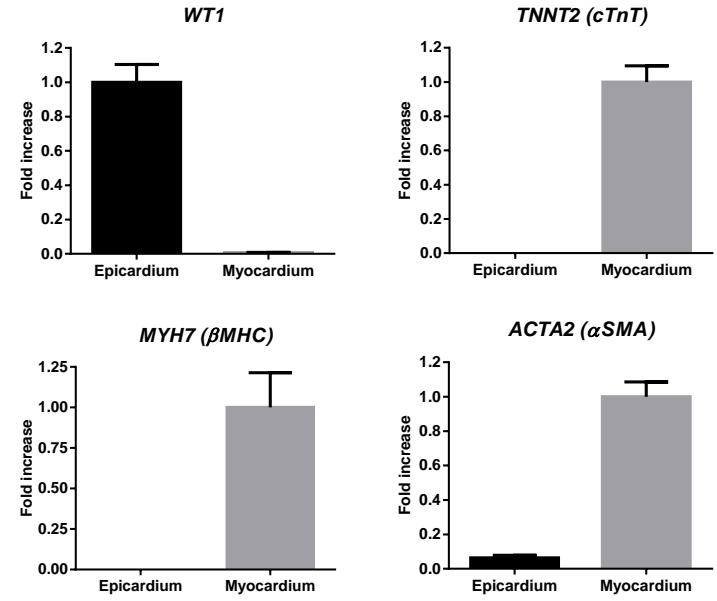

**Figure S2**

**a**

| Marker                        | Fetal EPDCs | Adult EPDCs |
|-------------------------------|-------------|-------------|
| <i>VCAM1</i>                  | +++         | +++         |
| <i>UPK1B</i>                  | ++          | ++          |
| <i>CTGF</i>                   | ++          | ++          |
| <i>WT1</i><br>(Isoform 17AA+) | ++          | ++          |
| <i>GATA4</i>                  | ++          | ++          |
| <i>GPM6A</i>                  | +           | +           |
| <i>TBX5</i>                   | +           | +           |
| <i>MEF2C</i>                  | +           | +           |
| <i>ENG</i>                    | +           | +           |
| <i>PDGFRB</i>                 | ++          | +           |
| <i>PDGFRA</i>                 | ++          | +           |
| <i>UPK3B</i>                  | ++          | +           |

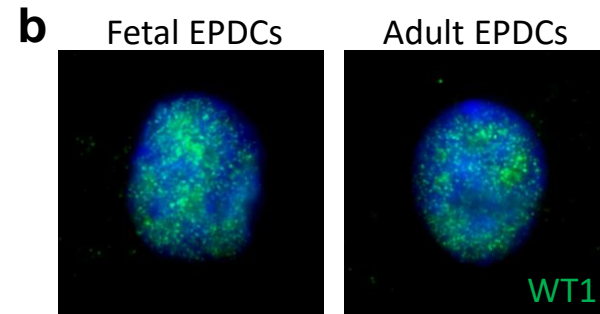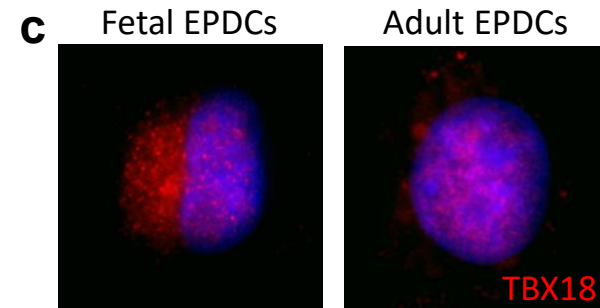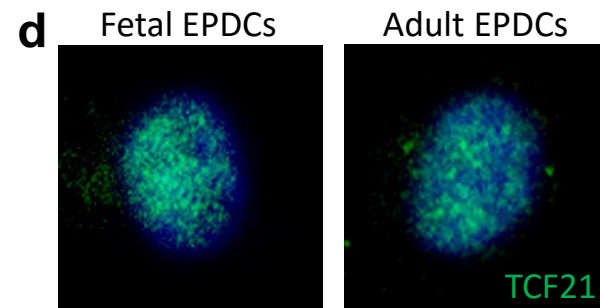

# Figure S3

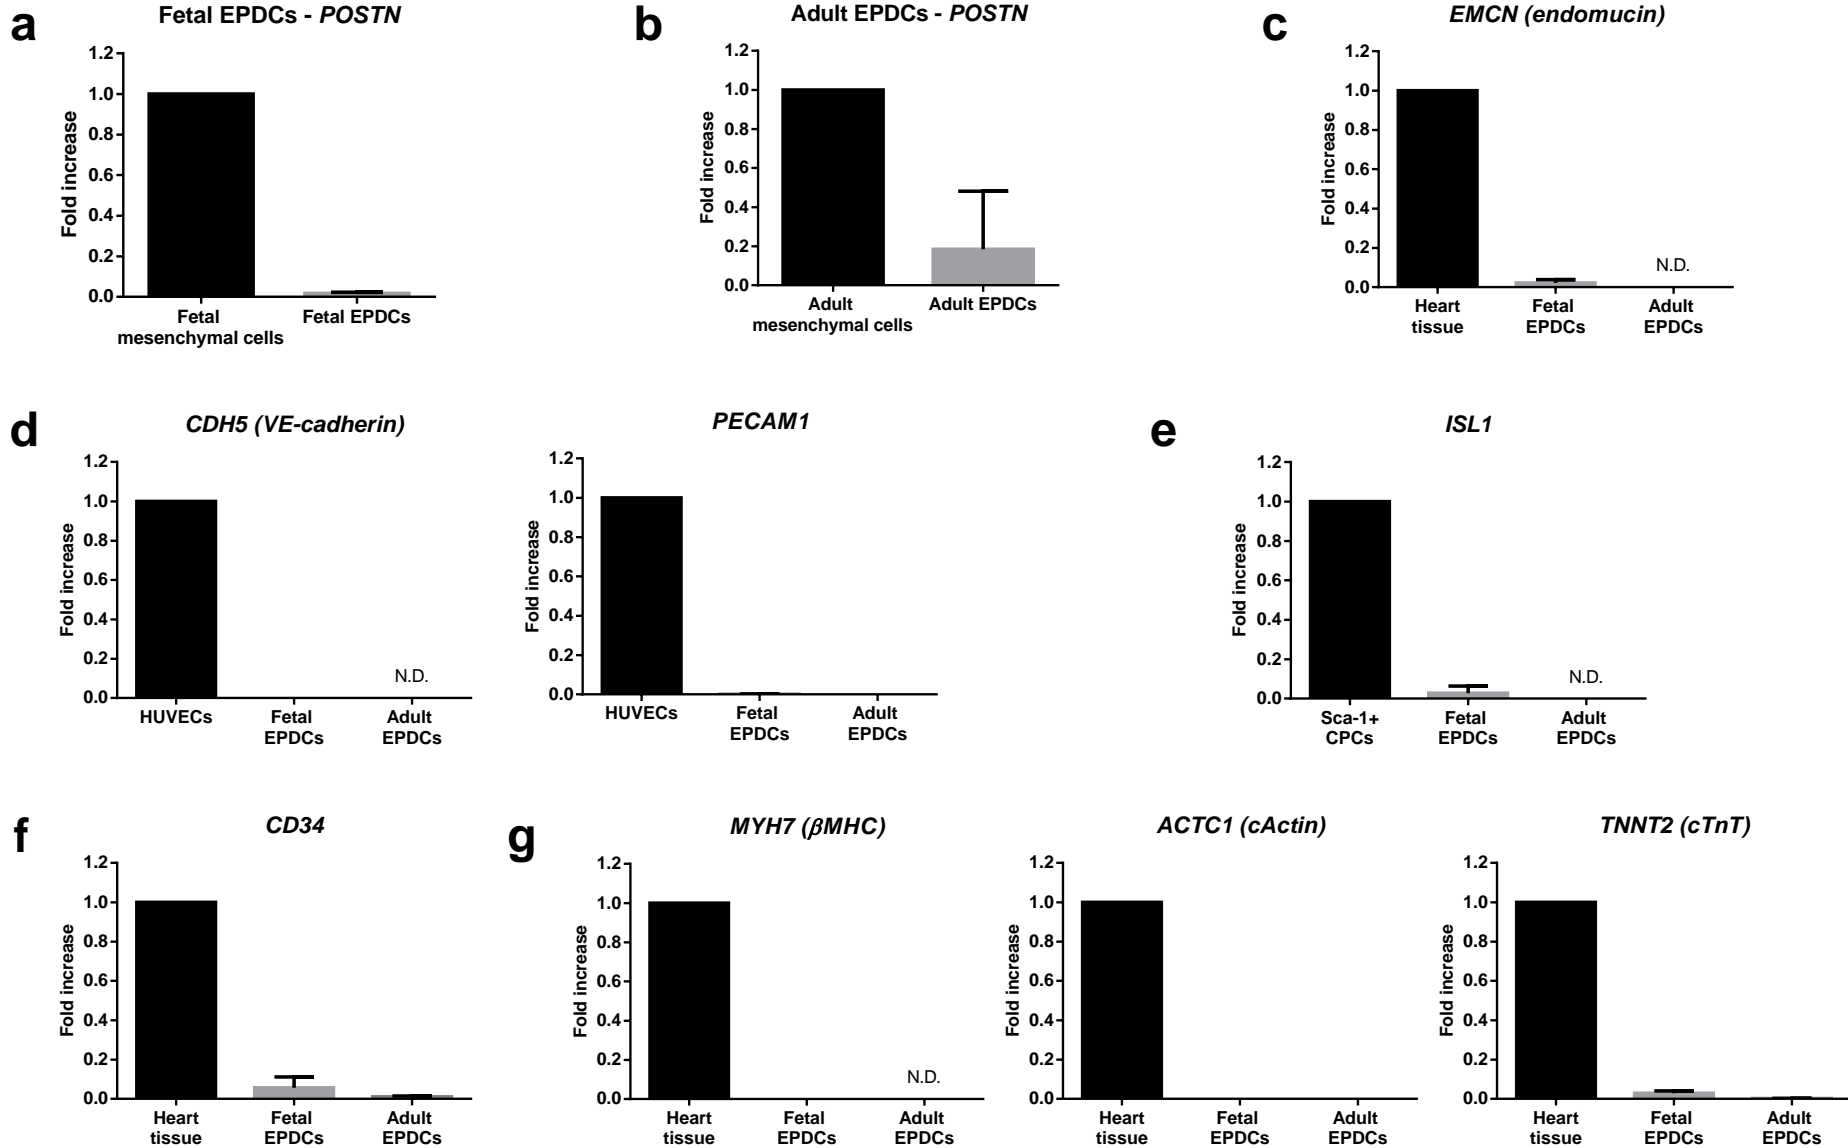

**Figure S4**

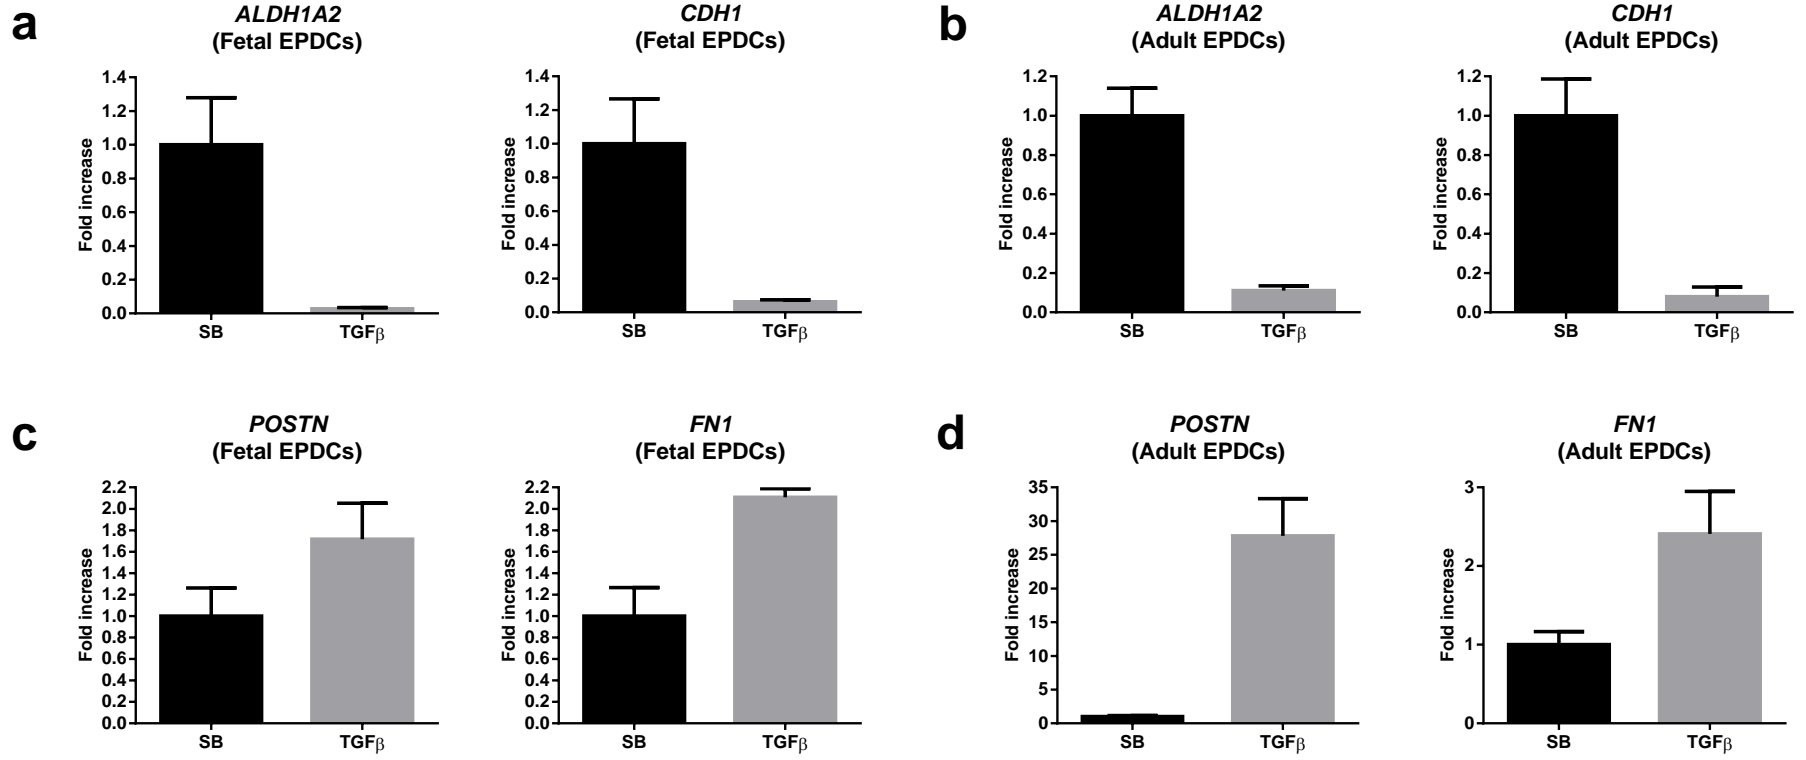

**Figure S5**

**a**

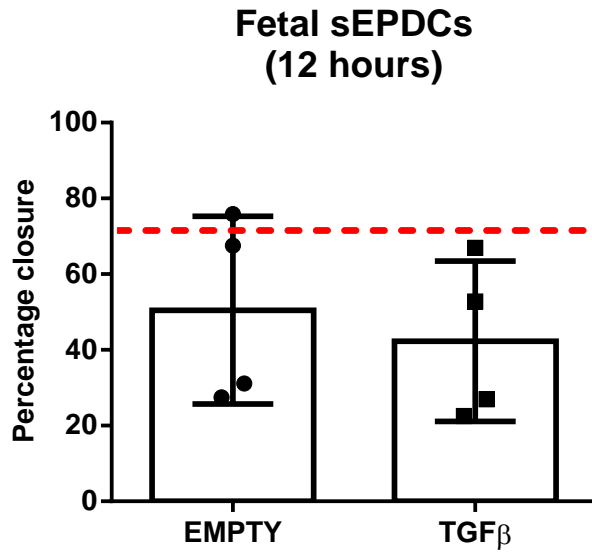

**b**

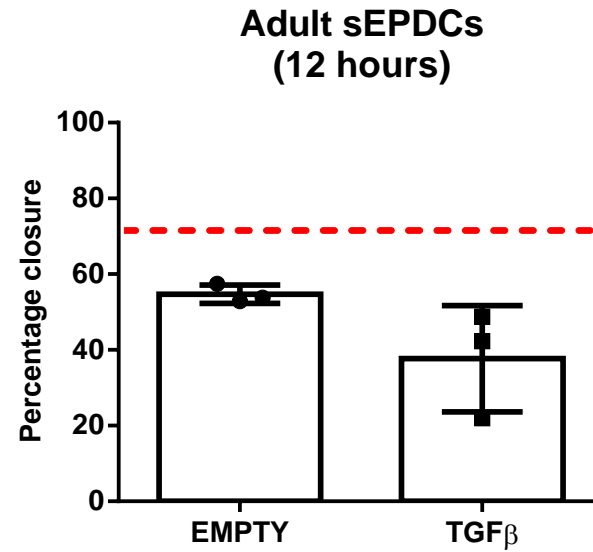

**c**

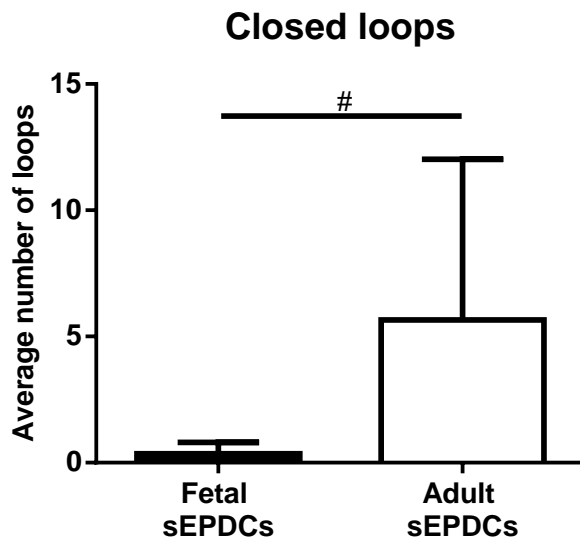

**d**

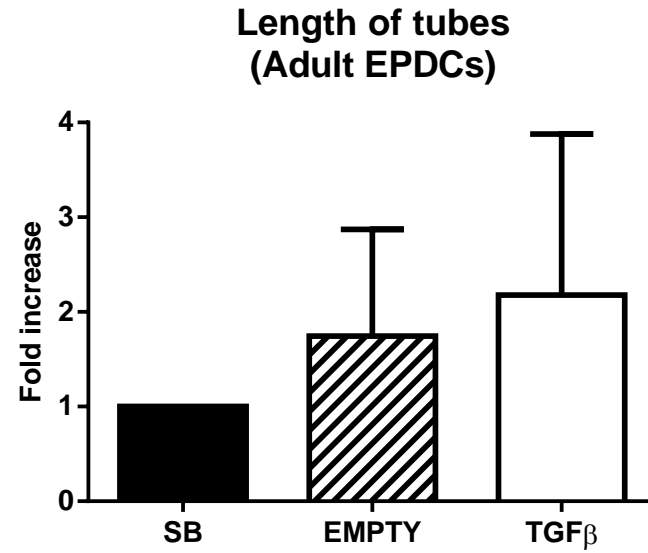

**Figure S6**

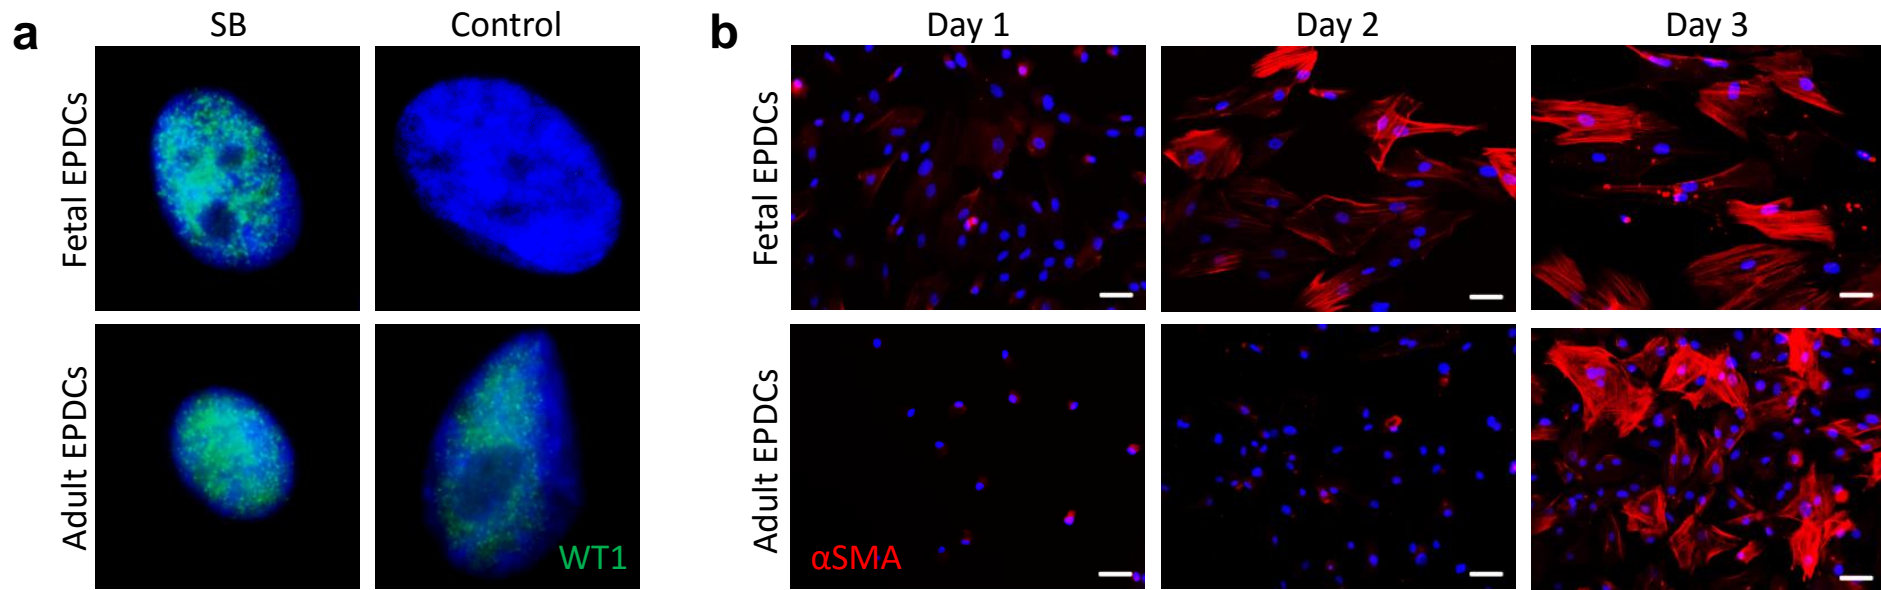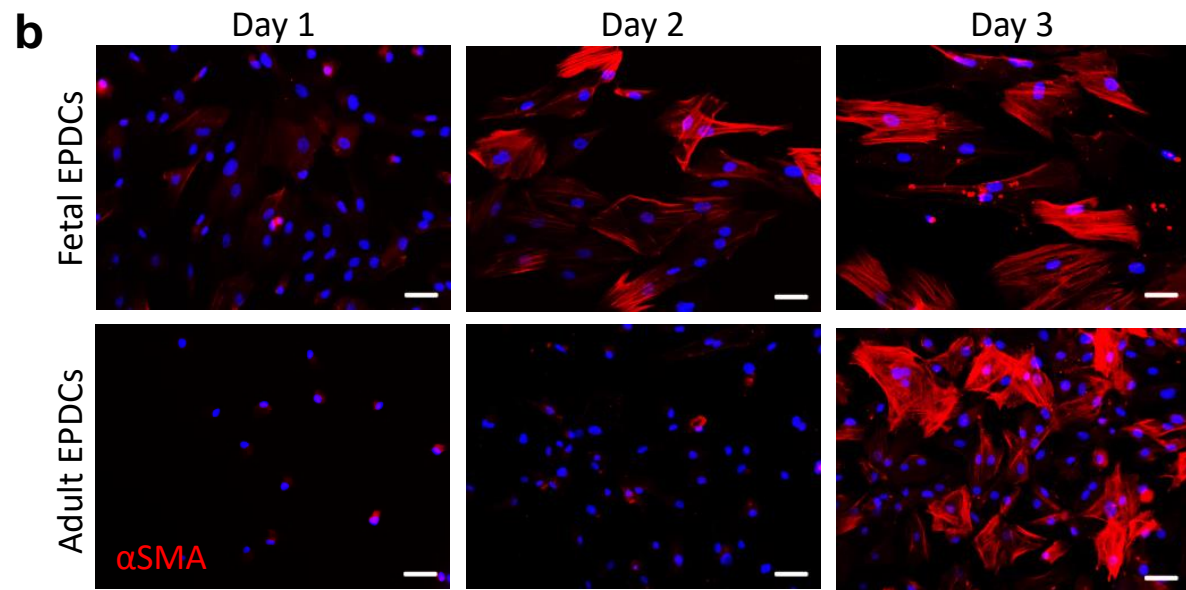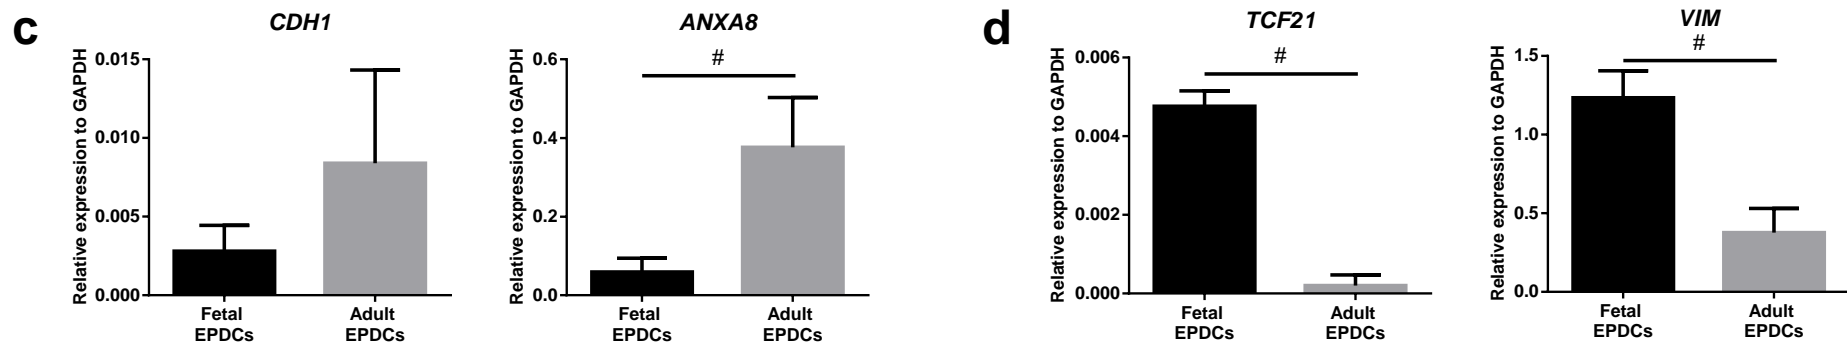

Supplement: 13287_2016_434_MOESM1_ESM.pdf [file 13287_2016_434_MOESM1_ESM.pdf]
